# Supplementary material for: Long-term use of proton-pump inhibitors: whole-of-population patterns in Australia 2013–2016
Source: PubMed Central journal article supplement — Ther Adv Gastroenterol. 2020 Mar 19;13:1756284820913743. doi: 10.1177/1756284820913743 (PMC7082869; doi:10.1177/1756284820913743), 2020-03-19
Supplement: Supplementary_Table.pdf [file Supplementary_Table.pdf]

Supplementary Table A. Prevalence and incidence of PPI use, per 100 population, overall and by sex, age, and PPI strength. July 2013 – July 2016

|                 | Prevalence |       |       |                   |       |       |               |      |       |              |      |      |
|-----------------|------------|-------|-------|-------------------|-------|-------|---------------|------|-------|--------------|------|------|
|                 | Overall    |       |       | Standard strength |       |       | High strength |      |       | Low strength |      |      |
|                 | 2014       | 2015  | 2016  | 2014              | 2015  | 2016  | 2014          | 2015 | 2016  | 2014         | 2015 | 2016 |
| All individuals | 12.19      | 12.35 | 12.55 | 9.48              | 9.63  | 9.75  | 3.31          | 3.23 | 3.25  | 0.77         | 0.84 | 0.93 |
| 0 - 17          | 0.98       | 1.02  | 1.03  | 0.57              | 0.59  | 0.6   | 0.12          | 0.11 | 0.11  | 0.35         | 0.37 | 0.38 |
| 18 - 34         | 4.21       | 4.36  | 4.52  | 2.82              | 3     | 3.13  | 1.54          | 1.46 | 1.46  | 0.27         | 0.32 | 0.36 |
| 35 - 49         | 9.53       | 9.59  | 9.84  | 6.86              | 6.99  | 7.15  | 3.24          | 3.06 | 3.1   | 0.52         | 0.59 | 0.65 |
| 50 - 64         | 19.21      | 19.34 | 19.76 | 14.98             | 15.16 | 15.38 | 5.43          | 5.19 | 5.28  | 1.03         | 1.13 | 1.27 |
| 65 - 74         | 30.55      | 32    | 33.4  | 25.03             | 26.06 | 27.09 | 7.46          | 7.83 | 8.13  | 1.68         | 1.88 | 2.15 |
| 75 - 84         | 39.6       | 40.89 | 42.18 | 32.95             | 33.82 | 34.75 | 8.64          | 9.01 | 9.28  | 2.4          | 2.63 | 2.95 |
| 85+             | 39.38      | 41.34 | 42.78 | 32.94             | 34.37 | 35.47 | 7.57          | 8.02 | 8.17  | 2.99         | 3.29 | 3.72 |
| Female          | 13.05      | 13.42 | 13.84 | 10.07             | 10.38 | 10.67 | 3.7           | 3.68 | 3.76  | 0.86         | 0.95 | 1.07 |
| 0 - 17          | 1.1        | 1.14  | 1.16  | 0.65              | 0.69  | 0.7   | 0.15          | 0.14 | 0.14  | 0.36         | 0.38 | 0.39 |
| 18 - 34         | 4.65       | 4.84  | 5.06  | 3.1               | 3.32  | 3.48  | 1.68          | 1.6  | 1.63  | 0.34         | 0.39 | 0.44 |
| 35 - 49         | 9.85       | 10    | 10.33 | 6.95              | 7.14  | 7.37  | 3.54          | 3.39 | 3.46  | 0.57         | 0.65 | 0.72 |
| 50 - 64         | 20.72      | 20.93 | 21.37 | 15.95             | 16.17 | 16.41 | 6.28          | 6.07 | 6.16  | 1.17         | 1.28 | 1.45 |
| 65 - 74         | 32.8       | 34.39 | 35.9  | 26.69             | 27.81 | 28.94 | 8.48          | 8.93 | 9.26  | 1.88         | 2.11 | 2.4  |
| 75 - 84         | 42.03      | 43.27 | 44.49 | 34.76             | 35.54 | 36.4  | 9.57          | 9.95 | 10.26 | 2.64         | 2.87 | 3.21 |
| 85+             | 40.74      | 42.5  | 43.63 | 33.99             | 35.2  | 36.02 | 7.83          | 8.31 | 8.42  | 3.26         | 3.57 | 4    |
| Male            | 10.67      | 10.91 | 11.24 | 8.37              | 8.59  | 8.82  | 2.74          | 2.68 | 2.73  | 0.64         | 0.71 | 0.79 |
| 0 - 17          | 0.87       | 0.91  | 0.91  | 0.48              | 0.51  | 0.5   | 0.09          | 0.08 | 0.08  | 0.35         | 0.37 | 0.37 |
| 18 - 34         | 3.78       | 3.88  | 3.98  | 2.55              | 2.68  | 2.78  | 1.4           | 1.32 | 1.3   | 0.22         | 0.26 | 0.28 |
| 35 - 49         | 9.21       | 9.19  | 9.35  | 6.77              | 6.83  | 6.93  | 2.92          | 2.73 | 2.74  | 0.47         | 0.52 | 0.58 |
| 50 - 64         | 17.65      | 17.7  | 18.1  | 13.97             | 14.11 | 14.33 | 4.55          | 4.29 | 4.38  | 0.89         | 0.97 | 1.09 |
| 65 - 74         | 28.22      | 29.51 | 30.8  | 23.31             | 24.25 | 25.18 | 6.41          | 6.68 | 6.96  | 1.48         | 1.65 | 1.89 |
| 75 - 84         | 36.79      | 38.14 | 39.5  | 30.85             | 31.84 | 32.84 | 7.58          | 7.92 | 8.15  | 2.12         | 2.35 | 2.65 |
| 85+             | 37.07      | 39.36 | 41.33 | 31.14             | 32.96 | 34.54 | 7.12          | 7.53 | 7.77  | 2.54         | 2.82 | 3.25 |

|                 | Incidence |      |      |                   |      |      |               |      |      |              |      |      |
|-----------------|-----------|------|------|-------------------|------|------|---------------|------|------|--------------|------|------|
|                 | Overall   |      |      | Standard strength |      |      | High strength |      |      | Low strength |      |      |
|                 | 2014      | 2015 | 2016 | 2014              | 2015 | 2016 | 2014          | 2015 | 2016 | 2014         | 2015 | 2016 |
| All individuals | 3.82      | 3.77 | 3.91 | 2.38              | 2.41 | 2.46 | 1.18          | 1.07 | 1.14 | 0.26         | 0.29 | 0.31 |
| 0 - 17          | 0.76      | 0.78 | 0.79 | 0.4               | 0.41 | 0.42 | 0.08          | 0.08 | 0.08 | 0.28         | 0.29 | 0.3  |
| 18 - 34         | 2.77      | 2.82 | 2.96 | 1.64              | 1.75 | 1.84 | 0.96          | 0.87 | 0.9  | 0.17         | 0.2  | 0.22 |
| 35 - 49         | 4.29      | 4.24 | 4.5  | 2.55              | 2.64 | 2.76 | 1.53          | 1.36 | 1.47 | 0.22         | 0.25 | 0.27 |
| 50 - 64         | 5.8       | 5.63 | 6.03 | 3.64              | 3.67 | 3.79 | 1.87          | 1.65 | 1.88 | 0.29         | 0.32 | 0.36 |
| 65 - 74         | 6.39      | 6.54 | 6.87 | 4.21              | 4.32 | 4.49 | 1.84          | 1.84 | 1.95 | 0.33         | 0.38 | 0.42 |
| 75 - 84         | 6.52      | 6.57 | 6.72 | 4.53              | 4.53 | 4.62 | 1.61          | 1.62 | 1.64 | 0.38         | 0.42 | 0.46 |
| 85+             | 6.05      | 6.15 | 6.11 | 4.38              | 4.43 | 4.38 | 1.26          | 1.29 | 1.25 | 0.41         | 0.43 | 0.48 |
| Female          | 4.11      | 4.13 | 4.34 | 2.55              | 2.63 | 2.73 | 1.27          | 1.17 | 1.26 | 0.29         | 0.32 | 0.35 |
| 0 - 17          | 0.86      | 0.88 | 0.91 | 0.47              | 0.49 | 0.5  | 0.1           | 0.1  | 0.1  | 0.28         | 0.3  | 0.31 |
| 18 - 34         | 3.22      | 3.29 | 3.46 | 1.93              | 2.07 | 2.17 | 1.07          | 0.98 | 1.02 | 0.21         | 0.25 | 0.27 |
| 35 - 49         | 4.71      | 4.71 | 5    | 2.79              | 2.92 | 3.06 | 1.67          | 1.5  | 1.63 | 0.25         | 0.29 | 0.32 |
| 50 - 64         | 6.36      | 6.23 | 6.64 | 3.95              | 4.01 | 4.13 | 2.07          | 1.85 | 2.09 | 0.34         | 0.37 | 0.42 |
| 65 - 74         | 6.63      | 6.81 | 7.15 | 4.32              | 4.44 | 4.64 | 1.93          | 1.94 | 2.03 | 0.38         | 0.43 | 0.47 |
| 75 - 84         | 6.58      | 6.57 | 6.7  | 4.56              | 4.51 | 4.59 | 1.6           | 1.61 | 1.61 | 0.41         | 0.46 | 0.5  |
| 85+             | 5.89      | 6.02 | 5.86 | 4.28              | 4.33 | 4.2  | 1.18          | 1.22 | 1.15 | 0.44         | 0.47 | 0.51 |
| Male            | 3.33      | 3.3  | 3.48 | 2.07              | 2.12 | 2.2  | 1.04          | 0.94 | 1.02 | 0.22         | 0.24 | 0.26 |
| 0 - 17          | 0.66      | 0.69 | 0.68 | 0.32              | 0.34 | 0.34 | 0.07          | 0.06 | 0.06 | 0.27         | 0.29 | 0.28 |
| 18 - 34         | 2.32      | 2.36 | 2.46 | 1.35              | 1.44 | 1.52 | 0.85          | 0.77 | 0.78 | 0.12         | 0.15 | 0.16 |
| 35 - 49         | 3.87      | 3.77 | 3.99 | 2.3               | 2.36 | 2.45 | 1.38          | 1.21 | 1.31 | 0.18         | 0.2  | 0.23 |
| 50 - 64         | 5.23      | 5.02 | 5.4  | 3.32              | 3.32 | 3.44 | 1.67          | 1.44 | 1.66 | 0.24         | 0.26 | 0.3  |
| 65 - 74         | 6.13      | 6.25 | 6.58 | 4.1               | 4.19 | 4.33 | 1.75          | 1.74 | 1.87 | 0.29         | 0.33 | 0.37 |
| 75 - 84         | 6.46      | 6.57 | 6.74 | 4.5               | 4.57 | 4.65 | 1.62          | 1.64 | 1.67 | 0.34         | 0.37 | 0.41 |
| 85+             | 6.3       | 6.36 | 6.54 | 4.55              | 4.59 | 4.69 | 1.4           | 1.4  | 1.42 | 0.36         | 0.37 | 0.44 |
